# Supplementary material for: Poly(propylene)-grafted thermally reduced graphene oxide and its compatibilization effect on poly(propylene)–graphene nanocomposites
Source: Royal Society of Chemistry journal article supplement (doi:10.1039/c6ra17934g), 2016-01-01
Supplement: c6ra17934g1.pdf [file c6ra17934g1.pdf]

**[Electronic Supplementary Information]**

**Poly(propylene)-grafted thermally reduced graphene oxide and  
its compatibilization effect on poly(propylene)-graphene  
nanocomposites**

Song Ho Kim<sup>a,b</sup>, Kyunghoon Kim<sup>b</sup> and O Ok Park<sup>a,\*</sup>

<sup>a</sup>Department of Chemical and Biomolecular Engineering (BK21+ graduate program), Korea Advanced Institute of Science and Technology (KAIST), 291 Daehak-ro, Yuseong-gu, Daejeon 34141, Republic of Korea.

<sup>b</sup>Lotte Chemical Research Institute, 115 Gajeongbuk-ro, Yuseong-gu, Daejeon 34110, Republic of Korea

\*E-mail: oopark@kaist.ac.kr (OOP)

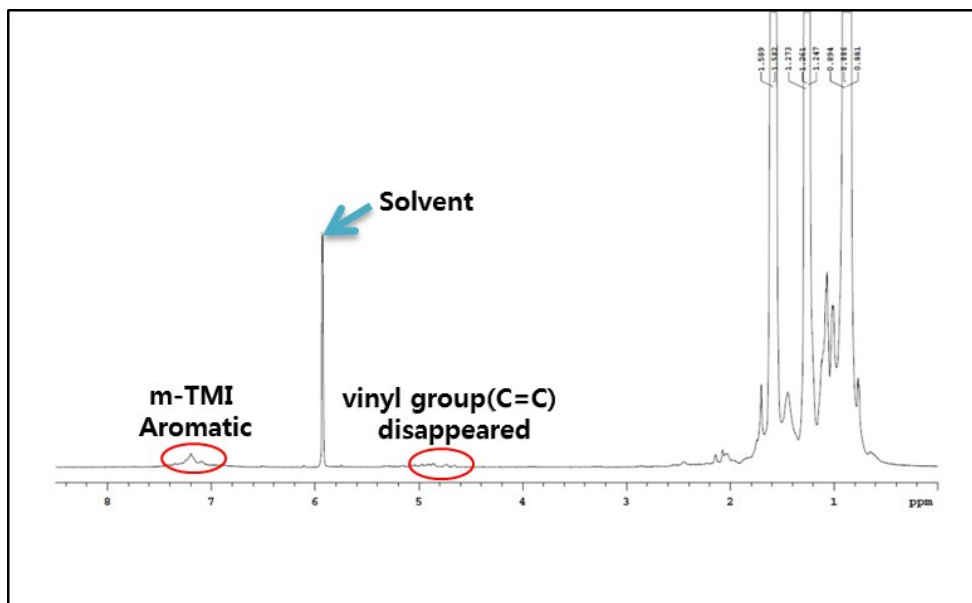

**Figure S1.** <sup>1</sup>H-NMR Spectra of PP-g-m-TMI.

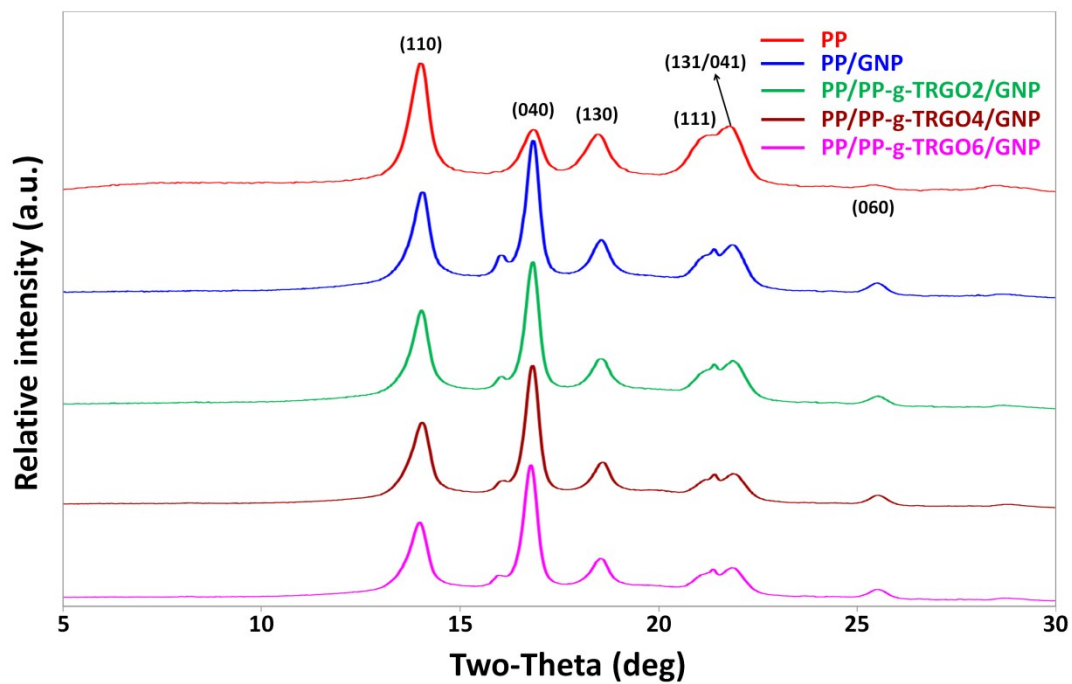

**Figure S2.** XRD patterns of PP, PP/GNP, PP/PP-g-TRGO2/GNP, PP/PP-g-TRGO4/GNP and PP/PP-g-TRGO6/GNP nanocomposites with GNP (1.0wt.%) and PP-g-TRGO2/4/6 (0.1wt.%).

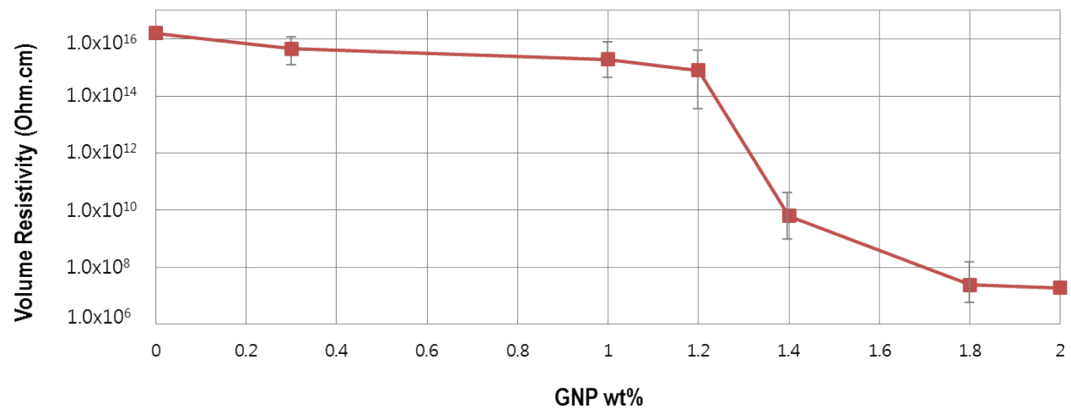

**Figure S3.** Volume resistivity of PP/GNP nanocomposites.
